# Supplementary material for: Cardiac Troponin T and Troponin I in the General Population: Comparing and Contrasting Their Genetic Determinants and Associations With Outcomes
Source: PubMed Central journal article supplement (PMC6571179; doi:10.1161/circulationaha.118.038529), 2019-04-24

## **SUPPLEMENTAL MATERIAL**

Welsh et al

Cardiac Troponin T and Troponin I in the general population: comparing and contrasting genetic determinants and their associations with outcomes

Supplemental Table 1: Classical CVD risk factors by categories of cTnI and cTnT (low; cTnT  $\leq$ 3ng/L & cTnI  $\leq$ 1.8ng/L, intermediate; cTnT 3.01-5.79ng/L & cTnI 1.9-3.0ng/L, high cTnT  $\geq$ 5.8ng/L & cTnI  $\geq$ 3.1ng/L)

|                                 | cTnI         |                   |              |         | cTnT         |                   |              |         |
|---------------------------------|--------------|-------------------|--------------|---------|--------------|-------------------|--------------|---------|
|                                 | Low cTnI     | Intermediate cTnI | High cTnI    | p-value | Low cTnT     | Intermediate cTnT | High cTnT    | p-value |
|                                 | n=9426       | n=5052            | N=5023       |         | n=9106       | n=5200            | n=5195       |         |
| Age                             | 41.2 (13.5)  | 50.4 (13.3)       | 54.7 (14.6)  | <0.0001 | 42.2 (13.0)  | 48.2 (14.2)       | 54.5 (15.7)  | <0.0001 |
| Male sex                        | 2628 (27.9%) | 2401 (47.5%)      | 3097 (61.7%) | <0.0001 | 2557 (28.1%) | 2507 (48.2%)      | 3062 (58.9%) | <0.0001 |
| Body mass index (kg/M2)         | 25.8 (5.1)   | 27.2 (5.0)        | 27.8 (5.2)   | <0.0001 | 26.2 (5.2)   | 26.9 (5.1)        | 27.3 (5.2)   | <0.0001 |
| Systolic blood pressure (mmHg)  | 125.1 (15.2) | 134.7 (16.9)      | 139.6 (18.8) | <0.0001 | 126.9 (16.1) | 133.1 (17.4)      | 137.4 (18.9) | <0.0001 |
| Total cholesterol (mmol/L)      | 4.96 (1.03)  | 5.30 (1.10)       | 5.15 (1.11)  | <0.0001 | 5.10 (1.06)  | 5.16 (1.10)       | 5.04 (1.10)  | <0.0001 |
| HDL cholesterol (mmol/L)        | 1.49 (0.40)  | 1.45 (0.42)       | 1.42 (0.41)  | <0.0001 | 1.48 (0.40)  | 1.45 (0.41)       | 1.44 (0.42)  | <0.0001 |
| SIMD score                      | 12 (7, 24)   | 11 (7, 22)        | 11 (7, 22)   | <0.0001 | 12 (7, 24)   | 11 (7, 21)        | 11 (7, 20)   | <0.0001 |
| Creatinine ( $\mu$ mol/L)       | 70.3 (12.7)  | 74.2 (14.8)       | 79.9 (20.0)  | <0.0001 | 71.0 (12.4)  | 73.9 (14.1)       | 78.7 (21.0)  | <0.0001 |
| Current smoker                  | 1759 (19.3%) | 735 (15.1%)       | 562 (11.5%)  | <0.0001 | 1719 (19.5%) | 705 (14.1%)       | 632 (12.5%)  | <0.0001 |
| Family history of heart disease | 3629 (39.3%) | 1912 (38.8%)      | 1863 (37.8%) | 0.184   | 3497 (39.2%) | 2000 (39.4%)      | 1907 (37.4%) | 0.0476  |

|                                                     |            |            |             |         |            |            |             |         |
|-----------------------------------------------------|------------|------------|-------------|---------|------------|------------|-------------|---------|
| Rheumatoid arthritis                                | 112 (1.2%) | 92 (1.8%)  | 110 (2.2%)  | <0.0001 | 113 (1.2%) | 88 (1.7%)  | 113 (2.2%)  | <0.0001 |
| Baseline heart disease or stroke                    | 184 (2.0%) | 209 (4.1%) | 484 (9.6%)  | <0.0001 | 184 (2.0%) | 217 (4.2%) | 476 (9.2%)  | <0.0001 |
| Baseline diabetes                                   | 188 (2.0%) | 132 (2.6%) | 242 (4.8%)  | <0.0001 | 118 (1.3%) | 143 (2.8%) | 301 (5.8%)  | <0.0001 |
| Baseline use of cholesterol lowering medications    | 224 (2.4%) | 401 (7.9%) | 657 (13.1%) | <0.0001 | 260 (2.9%) | 344 (6.6%) | 678 (13.1%) | <0.0001 |
| Baseline use of blood pressure lowering medications | 263 (2.8%) | 471 (9.3%) | 840 (16.7%) | <0.0001 | 330 (3.6%) | 445 (8.6%) | 799 (15.4%) | <0.0001 |

Values are mean (sd) for continuous variables (median and Q1-Q3 for SIMD), and n (%) for categorical variables

P-values from ANOVA for continuous variables (excepting SIMD, which is by Kruskal-Wallis test) and chi-squared for categorical variables

Supplemental Table 2: Association of classical risk factors and Troponin I and Troponin T with death from CVD causes

|                               | <b>Did not die from<br/>CVD causes<br/>N=19235</b> | <b>Died from<br/>CVD causes<br/>N=266</b> | <b>p-value</b> |
|-------------------------------|----------------------------------------------------|-------------------------------------------|----------------|
| Age (years)                   | 46.8±14.8                                          | 69.1±12.2                                 | <0.0001        |
| Male sex                      | 7988(41.5%)                                        | 138(51.9%)                                | 0.0007         |
| BMI (kg/m <sup>2</sup> )      | 26.6±5.2                                           | 28.0±5.4                                  | <0.0001        |
| SBP (mmHg)                    | 131.2±17.7                                         | 143.7±21.7                                | <0.0001        |
| Total cholesterol<br>(mmol/L) | 5.11±1.08                                          | 4.69±1.16                                 | <0.0001        |
| HDL cholesterol<br>(mmol/L)   | 1.46±0.41                                          | 1.36±0.43                                 | <0.0001        |
| SIMD (score/10)               | 1.70±1.45                                          | 2.06±1.68                                 | <0.0001        |
| Creatinine                    | 73.6±15.5                                          | 88.2±30.2                                 | <0.0001        |
| Cigarettes per day            | 2.4±6.9                                            | 4.9±12.8                                  | <0.0001        |
| Current smoking               | 3004(16.1%)                                        | 52(20.5%)                                 | 0.0630         |
| Family History of<br>CVD      | 7312(38.8%)                                        | 92(35.0%)                                 | 0.2019         |
| Rheumatoid arthritis          | 300(1.6%)                                          | 14(5.3%)                                  | <0.0001        |
| Baseline CVD                  | 785(4.1%)                                          | 92(34.6%)                                 | <0.0001        |
| Baseline diabetes             | 519(2.7%)                                          | 43(16.2%)                                 | <0.0001        |
| Cholesterol<br>medications    | 1215(6.3%)                                         | 67(25.2%)                                 | <0.0001        |
| Blood pressure<br>medication  | 1494(0.078)                                        | 80(0.301)                                 | <0.0001        |
| hsTnT (ng/L)                  | 3.3[1.5,5.9]                                       | 9.3 [4.9,16.3]                            | <0.0001        |
| hsTnI (ng/L)                  | 1.9[0.6,3.1]                                       | 4.9 [2.7,8.9]                             | <0.0001        |

Supplemental Table 3: Association of classical risk factors and Troponin I and Troponin T with non-CVD mortality

|                            | <b>Did not die, or died of CVD<br/>N=19127</b> | <b>Died from non-CVD causes<br/>N=374</b> | <b>p-value</b> |
|----------------------------|------------------------------------------------|-------------------------------------------|----------------|
| Age (years)                | 46.7±14.8                                      | 63.1±12.4                                 | <0.0001        |
| Male sex                   | 7958(41.6%)                                    | 168(44.9%)                                | 0.198          |
| BMI (kg/m <sup>2</sup> )   | 26.6±5.2                                       | 27.4±5.4                                  | 0.0069         |
| SBP (mmHg)                 | 131.2±17.7                                     | 141.6±22.0                                | <0.0001        |
| Total cholesterol (mmol/L) | 5.10±1.08                                      | 5.12±1.15                                 | 0.7729         |
| HDL chol (mmol/L)          | 1.46±0.41                                      | 1.48±0.47                                 | 0.285          |
| SIMD (score/10)            | 1.70±1.45                                      | 1.93±1.64                                 | 0.0024         |
| Creatinine                 | 73.7±15.7                                      | 79.7±25.3                                 | <0.0001        |
| Cigarettes per day         | 2.4±6.9                                        | 5.4±11.8                                  | <0.0001        |
| Current smoking            | 2968(16.0%)                                    | 88(24.6%)                                 | <0.0001        |
| Family History of CVD      | 7274(38.9%)                                    | 130(35.1%)                                | 0.1453         |
| Rheumatoid arthritis       | 294(1.5%)                                      | 20(5.3%)                                  | <0.0001        |
| Baseline CVD               | 838(4.4%)                                      | 39(10.4%)                                 | <0.0001        |
| Baseline diabetes          | 528(2.8%)                                      | 34(9.1%)                                  | <0.0001        |
| Cholesterol medications    | 1238(6.5%)                                     | 44(11.8%)                                 | <0.0001        |
| Blood pressure medication  | 1525(8.0%)                                     | 49(13.1%)                                 | 0.0003         |
| hsTnT (ng/L)               | 3.3[1.5,5.9]                                   | 6.4 [3.8,10.5]                            | <0.0001        |
| hsTnI (ng/L)               | 1.9[0.6,3.1]                                   | 3.0 [1.8,4.9]                             | <0.0001        |

Supplemental Table 4: Association of classical risk factors and Troponin I and Troponin T with all cause mortality

|                            | <b>Did not die<br/>N=18861</b> | <b>Died<br/>N=640</b> | <b>p-value</b> |
|----------------------------|--------------------------------|-----------------------|----------------|
| Age (years)                | 46.4±14.6                      | 65.6±12.7             | <0.0001        |
| Male sex                   | 7820(41.5%)                    | 306(47.8%)            | 0.0013         |
| BMI (kg/m <sup>2</sup> )   | 26.6±5.2                       | 27.6±5.4              | <0.0001        |
| SBP (mmHg)                 | 131.0±17.5                     | 141.9±21.9            | <0.0001        |
| Total cholesterol (mmol/L) | 5.11±1.08                      | 4.94±1.17             | 0.0001         |
| HDL chol (mmol/L)          | 1.46±0.41                      | 1.43±0.46             | 0.0727         |
| SIMD (score/10)            | 1.69±1.45                      | 1.99±1.66             | <0.0001        |
| Creatinine                 | 73.5±15.3                      | 83.2±27.7             | <0.0001        |
| Cigarettes per day         | 2.4±6.7                        | 5.2±12.2              | <0.0001        |
| Current smoking            | 2916(16.0%)                    | 140(22.9%)            | <0.0001        |
| Family History of CVD      | 7182(38.9%)                    | 222(35.1%)            | 0.0509         |
| Rheumatoid arthritis       | 280(1.5%)                      | 34(5.3%)              | <0.0001        |
| Baseline CVD               | 746(4.0%)                      | 131(20.5%)            | <0.0001        |
| Baseline diabetes          | 485(2.6%)                      | 77(12.0%)             | <0.0001        |
| Cholesterol medications    | 1171(6.2%)                     | 111(17.3%)            | <0.0001        |
| Blood pressure medication  | 1445(7.7%)                     | 129(20.2%)            | <0.0001        |
| hsTnT (ng/L)               | 3.2[1.5,5.8]                   | 7.5 [4.1,12.3]        | <0.0001        |
| hsTnI (ng/L)               | 1.9[0.6,3.0]                   | 3.6 [2.0,6.2]         | <0.0001        |

Supplemental Table 5: Association of classical risk factors and Troponin I and Troponin T with myocardial infarction

|                            | <b>No incident MI<br/>N=19242</b> | <b>Incident MI<br/>N=259</b> | <b>p-value</b> |
|----------------------------|-----------------------------------|------------------------------|----------------|
| Age (years)                | 46.9±14.9                         | 60.8±10.5                    | <0.0001        |
| Male sex                   | 7948(41.3%)                       | 178(68.7%)                   | <0.0001        |
| BMI (kg/m <sup>2</sup> )   | 26.6±5.2                          | 28.7±5.3                     | <0.0001        |
| SBP (mmHg)                 | 131.2±17.8                        | 141.1±18.3                   | <0.0001        |
| Total cholesterol (mmol/L) | 5.10±1.08                         | 5.39±1.24                    | <0.0001        |
| HDL cholesterol (mmol/L)   | 1.46±0.41                         | 1.27±0.36                    | <0.0001        |
| SIMD (score/10)            | 1.69±1.45                         | 2.13±1.69                    | <0.0001        |
| Creatinine                 | 73.7±15.8                         | 80.8±19.6                    | <0.0001        |
| Cigarettes per day         | 2.4±7.0                           | 4.2±9.1                      | <0.0001        |
| Current smoking            | 3001(16.1%)                       | 55(22.0%)                    | 0.0123         |
| Family History of CVD      | 7305(38.8%)                       | 99(38.5%)                    | 0.9294         |
| Rheumatoid arthritis       | 307(1.6%)                         | 7(2.7%)                      | 0.1596         |
| Baseline CVD               | 821(4.3%)                         | 56(21.6%)                    | <0.0001        |
| Baseline diabetes          | 532(2.8%)                         | 30(11.6%)                    | <0.0001        |
| Cholesterol medications    | 1232(6.4%)                        | 50(19.3%)                    | <0.0001        |
| Blood pressure medication  | 1526(7.9%)                        | 48(18.5%)                    | <0.0001        |
| hsTnT (ng/L)               | 3.3[1.5,6.0]                      | 5.3 [1.5,10.0]               | <0.0001        |
| hsTnI (ng/L)               | 1.9[0.6,3.1]                      | 3.1 [2.0,5.2]                | <0.0001        |

Supplemental Table 6: Association of classical risk factors and Troponin I and Troponin T with coronary heart disease

|                            | <b>No incident CHD<br/>n=18689</b> | <b>Incident CHD<br/>N=812</b> | <b>p-value</b> |
|----------------------------|------------------------------------|-------------------------------|----------------|
| Age (years)                | 46.4±14.8                          | 62.1±10.7                     | <0.0001        |
| Male sex                   | 7622(40.8%)                        | 504(62.1%)                    | <0.0001        |
| BMI (kg/m <sup>2</sup> )   | 26.6±5.2                           | 28.7±5.1                      | <0.0001        |
| SBP (mmHg)                 | 130.9±17.6                         | 140.6±20.0                    | <0.0001        |
| Total cholesterol (mmol/L) | 5.10±1.07                          | 4.99±1.21                     | 0.0024         |
| HDL cholesterol (mmol/L)   | 1.47±0.41                          | 1.30±0.39                     | <0.0001        |
| SIMD (score/10)            | 1.69±1.44                          | 1.97±1.69                     | <0.0001        |
| Creatinine                 | 73.5±15.5                          | 81.7±22.8                     | <0.0001        |
| Cigarettes per day         | 2.4±6.9                            | 3.69±9.0                      | <0.0001        |
| Current smoking            | 2907(16.1%)                        | 149(19.1%)                    | 0.0271         |
| Family History of CVD      | 7093(38.8%)                        | 311(38.9%)                    | 0.9363         |
| Rheumatoid arthritis       | 283(1.5%)                          | 31(3.8%)                      | <0.0001        |
| Baseline CVD               | 566(3.0%)                          | 311(38.3%)                    | <0.0001        |
| Baseline diabetes          | 463(2.5%)                          | 99(12.2%)                     | <0.0001        |
| Cholesterol medications    | 1070(5.7%)                         | 212(26.1%)                    | <0.0001        |
| Blood pressure medication  | 1370(7.3%)                         | 204(25.1%)                    | <0.0001        |
| hsTnT (ng/L)               | 3.2[1.5,5.9]                       | 6.1 [3.3,10.4]                | <0.0001        |
| hsTnI (ng/L)               | 1.9[0.6,3.0]                       | 3.4 [2.1,5.6]                 | <0.0001        |



Supplemental Table 7: Association of classical risk factors and Troponin I and Troponin T with ischaemic stroke

|                            | <b>No incident ischaemic stroke<br/>N=19296</b> | <b>Incident ischaemic stroke N=205</b> | <b>p-value</b> |
|----------------------------|-------------------------------------------------|----------------------------------------|----------------|
| Age (years)                | 46.9±14.9                                       | 61.7±13.1                              | <0.0001        |
| Male sex                   | 8014(41.5%)                                     | 112(54.6%)                             | 0.0002         |
| BMI (kg/m <sup>2</sup> )   | 26.7±5.2                                        | 27.7±5.0                               | 0.0059         |
| SBP (mmHg)                 | 131.2±17.7                                      | 143.6±21.9                             | <0.0001        |
| Total cholesterol (mmol/L) | 5.10±1.08                                       | 5.11±1.22                              | 0.9122         |
| HDL cholesterol (mmol/L)   | 1.46±0.41                                       | 1.40±0.46                              | 0.0453         |
| SIMD (score/10)            | 1.70±1.45                                       | 1.90±1.60                              | 0.0617         |
| Creatinine                 | 73.7±15.8                                       | 81.9±19.9                              | <0.0001        |
| Cigarettes per day         | 2.4±7.0                                         | 4.6±9.3                                | <0.0001        |
| Current smoking            | 3008(16.1%)                                     | 48(24.1%)                              | 0.0023         |
| Family History of CVD      | 7327(38.8%)                                     | 77(38.5%)                              | 0.9329         |
| Rheumatoid arthritis       | 303(1.6%)                                       | 11(5.4%)                               | <0.0001        |
| Baseline CVD               | 838(4.3%)                                       | 39(19.0%)                              | <0.0001        |
| Baseline diabetes          | 539(2.8%)                                       | 23(11.2%)                              | <0.0001        |
| Cholesterol medications    | 1243(6.4%)                                      | 39(19.0%)                              | <0.0001        |
| Blood pressure medication  | 1522(7.9%)                                      | 52(25.4%)                              | <0.0001        |
| hsTnT (ng/L)               | 3.3[1.5,6.0]                                    | 6.4 [3.1,11.5]                         | <0.0001        |
| hsTnI (ng/L)               | 1.9[0.6,3.1]                                    | 3.6 [2.1,7.0]                          | <0.0001        |

Supplemental Table 8: Association of classical risk factors and Troponin I and Troponin T with heart failure (HF)

|                            | <b>No HF<br/>N=19285</b> | <b>HF<br/>N=216</b> | <b>p-value</b> |
|----------------------------|--------------------------|---------------------|----------------|
| Age (years)                | 46.9±14.9                | 64.7±13.1           | <0.0001        |
| Male sex                   | 7994(41.5%)              | 132(61.1%)          | <0.0001        |
| BMI (kg/m <sup>2</sup> )   | 26.6±5.2                 | 28.0±6.1            | <0.0001        |
| SBP (mmHg)                 | 131.2±17.7               | 141.4±21.5          | <0.0001        |
| Total cholesterol (mmol/L) | 5.10±1.08                | 4.82±1.19           | 0.0001         |
| HDL cholesterol (mmol/L)   | 1.46±0.41                | 1.38±0.46           | 0.0023         |
| SIMD (score/10)            | 1.70±1.46                | 1.73±1.46           | 0.8024         |
| Creatinine                 | 73.6±15.6                | 88.1±30.2           | <0.0001        |
| Cigarettes per day         | 2.4±6.9                  | 4.0±10.0            | 0.0018         |
| Current smoking            | 3018(16.2%)              | 38(18.4%)           | 0.3976         |
| Family History of CVD      | 7324(38.8%)              | 80(37.6%)           | 0.7110         |
| Rheumatoid arthritis       | 303(1.6%)                | 11(5.1%)            | <0.0001        |
| Baseline CVD               | 791(4.1%)                | 86(39.8%)           | <0.0001        |
| Baseline diabetes          | 530(2.7%)                | 32(14.8%)           | <0.0001        |
| Cholesterol medications    | 1236(6.4%)               | 46(21.3%)           | <0.0001        |
| Blood pressure medication  | 1530(7.9%)               | 44(20.4%)           | <0.0001        |
| hsTnT (ng/L)               | 3.3[1.5,6.0]             | 9.1 [4.4,14.3]      | <0.0001        |
| hsTnI (ng/L)               | 1.9[0.6,3.1]             | 5.1 [2.9,10.2]      | <0.0001        |

Supplemental Table 9: Association of classical risk factors and Troponin I and Troponin T with cancer

|                            | <b>No cancer<br/>N=18423</b> | <b>Cancer<br/>N=1078</b> | <b>p-value</b> |
|----------------------------|------------------------------|--------------------------|----------------|
| Age (years)                | 46.3±14.8                    | 59.5±11.4                | <0.0001        |
| Male sex                   | 7675(41.7%)                  | 451(41.8%)               | 0.9089         |
| BMI (kg/m <sup>2</sup> )   | 26.6±5.2                     | 27.5±5.2                 | <0.0001        |
| SBP (mmHg)                 | 131.0±17.6                   | 137.8±19.7               | <0.0001        |
| Total cholesterol (mmol/L) | 5.09±1.08                    | 5.22±1.12                | 0.0001         |
| HDL cholesterol (mmol/L)   | 1.46±0.41                    | 1.48±0.45                | 0.0613         |
| SIMD (score/10)            | 1.70±1.45                    | 1.72±1.49                | 0.7208         |
| Creatinine                 | 73.7±15.8                    | 76.1±18.3                | <0.0001        |
| Cigarettes per day         | 2.4±6.8                      | 3.4±9.0                  | <0.0001        |
| Current smoking            | 2875(16.1%)                  | 181(17.5%)               | 0.2425         |
| Family History of CVD      | 6986(38.8%)                  | 418(39.4%)               | 0.6758         |
| Rheumatoid arthritis       | 287(1.6%)                    | 27(2.5%)                 | 0.0164         |
| Baseline CVD               | 767(4.2%)                    | 110(10.2%)               | <0.0001        |
| Baseline diabetes          | 508(2.8%)                    | 54(5.0%)                 | <0.0001        |
| Cholesterol medications    | 1144(6.2%)                   | 138(12.8%)               | <0.0001        |
| Blood pressure medication  | 1411(7.7%)                   | 163(15.1%)               | <0.0001        |
| hsTnT (ng/L)               | 3.2[1.5,5.9]                 | 4.7 [1.5,8.1]            | <0.0001        |
| hsTnI (ng/L)               | 1.9[0.6,3.0]                 | 2.5 [1.5,4.0]            | <0.0001        |

Supplemental Table 10. Sensitivity analysis for GWAS: lead SNPs with a p-value  $\leq 5 \times 10^{-7}$  (GWAS significance attained at  $5 \times 10^{-8}$ ) and other SNPs in the same loci (at p-value  $\leq 1 \times 10^{-5}$ ) associated with both troponins

| Lead SNP                            | Chromosome | Position  | Non-effect allele | Effect allele | Minor allele frequency | P-value                | Beta   | Other SNPs                                                                                                                                                                                                                                                                                                                                                                                                                                                                                                                                                                                                                                                                                              | Nearest gene              |
|-------------------------------------|------------|-----------|-------------------|---------------|------------------------|------------------------|--------|---------------------------------------------------------------------------------------------------------------------------------------------------------------------------------------------------------------------------------------------------------------------------------------------------------------------------------------------------------------------------------------------------------------------------------------------------------------------------------------------------------------------------------------------------------------------------------------------------------------------------------------------------------------------------------------------------------|---------------------------|
| <b>Cardiac troponin I (n=19130)</b> |            |           |                   |               |                        |                        |        |                                                                                                                                                                                                                                                                                                                                                                                                                                                                                                                                                                                                                                                                                                         |                           |
| rs542754544                         | 1          | 37792490  | G                 | T             | 0.0028                 | $5.65 \times 10^{-08}$ | -0.519 |                                                                                                                                                                                                                                                                                                                                                                                                                                                                                                                                                                                                                                                                                                         | <i>Intergenic</i>         |
| rs542241509                         | 1          | 58174664  | T                 | G             | 0.0014                 | $1.39 \times 10^{-07}$ | 0.756  |                                                                                                                                                                                                                                                                                                                                                                                                                                                                                                                                                                                                                                                                                                         | <i>DAB1</i>               |
| rs140692556                         | 2          | 128218873 | C                 | T             | 0.0013                 | $2.70 \times 10^{-07}$ | 0.710  |                                                                                                                                                                                                                                                                                                                                                                                                                                                                                                                                                                                                                                                                                                         | <i>IWS1</i>               |
| rs187147685                         | 4          | 161910456 | G                 | T             | 0.0015                 | $3.58 \times 10^{-07}$ | 0.652  |                                                                                                                                                                                                                                                                                                                                                                                                                                                                                                                                                                                                                                                                                                         | <i>intergenic</i>         |
| rs4253248                           | 4          | 187155488 | G                 | A             | 0.4871                 | $1.25 \times 10^{-08}$ | 0.0497 | rs7682918; rs7683424; rs7661323; rs7683132; rs7684025; rs12507156; rs4862662; rs4862663; rs62350519; rs2292424; rs7687818; rs3817184; rs28698123; rs6835646; rs6810892; rs10000459; rs13106826; rs7667777; rs7377304; rs2276918; rs1053094; rs12331051; rs12331618; rs28797242; rs11132382; rs4862669; rs2048; rs4253238; rs1912826; rs3775298; rs1511801; rs1511802; rs4241815; rs4241816; rs4241817; rs4241818; rs4253252; rs3733402; rs4253253; rs4253254; rs4253255; rs66530140; rs35984397; rs4253281; rs4253282; rs80177406; rs2175495; rs1973612; rs4253295; rs4253297; rs2304595; rs4253303; rs4253304; rs4253305; rs4253308; rs4253311; rs2292423; rs4253320; rs3775303; rs4241822; rs12186258 | <i>KLKB1, CYP4V2, F11</i> |
| rs17876031                          | 5          | 176831119 | A                 | G             | 0.3568                 | $2.29 \times 10^{-07}$ | 0.048  | rs1801020; rs4976691; rs2731674; rs2731673; rs2545801; rs2731672                                                                                                                                                                                                                                                                                                                                                                                                                                                                                                                                                                                                                                        | <i>F12, GRK6</i>          |
| rs143593851                         | 8          | 137224801 | G                 | A             | 0.0014                 | $8.54 \times 10^{-08}$ | 0.773  |                                                                                                                                                                                                                                                                                                                                                                                                                                                                                                                                                                                                                                                                                                         | <i>intergenic</i>         |
| rs71483973                          | 10         | 75900464  | A                 | G             | 0.1679                 | $2.80 \times 10^{-09}$ | 0.072  | rs3750862; rs10824069; rs4746172; rs17743339; rs7912297; rs2270552; rs2131959; rs767809; rs2131957; rs1874151; rs1874150; rs3793921; rs2270551; rs16931177; rs2131956; rs34885185; rs10824071; rs10824072; rs10824073; rs6480716; rs7922894; rs12572820; rs11597732; rs703258; rs6480717; rs6480718; rs3180427; rs6688; rs7080130; rs7067855; rs7073435; rs7099026; rs11000882; rs7919821; rs10762576; rs2395086; rs6480719;                                                                                                                                                                                                                                                                            | <i>VCL, AP3MI, ADK</i>    |

|                           |    |           |   |   |        |                        |        |                                                                                                                                                              |                       |
|---------------------------|----|-----------|---|---|--------|------------------------|--------|--------------------------------------------------------------------------------------------------------------------------------------------------------------|-----------------------|
|                           |    |           |   |   |        |                        |        | rs11817132; rs4638254; rs6480721; rs10762577;<br>rs7082003; rs7912162; rs7894143; rs67594352;<br>rs10824095; rs10733895; rs4745741; rs10762581;<br>rs7915999 |                       |
| rs7080536                 | 10 | 115348046 | G | A | 0.0483 | 8.05X10 <sup>-08</sup> | -0.110 |                                                                                                                                                              | <i>HABP2</i>          |
| rs7481951                 | 11 | 22271870  | A | T | 0.4107 | 5.77X10 <sup>-10</sup> | 0.055  | rs10741930; rs10833719; rs12574283; rs4338529;<br>rs4500488; rs10766930; rs10833732; rs10833733;<br>rs10766931; rs10741935; rs10833736; rs10766935           | <i>ANO5</i>           |
| rs499423                  | 11 | 104727553 | T | A | 0.4422 | 2.98X10 <sup>-07</sup> | 0.057  |                                                                                                                                                              | <i>Intergenic</i>     |
| rs61971809                | 14 | 22057505  | T | C | 0.0236 | 5.63X10 <sup>-08</sup> | -0.160 | rs61971816                                                                                                                                                   | <i>Intergenic</i>     |
| rs148050755               | 17 | 62516959  | A | C | 0.0026 | 3.28X10 <sup>-11</sup> | -0.774 | rs187364357; rs138838734                                                                                                                                     | <i>CEP95, SMURF2</i>  |
| rs2298711                 | 18 | 57000469  | T | A | 0.1512 | 9.80X10 <sup>-12</sup> | 0.083  | rs117153087; rs12604758; rs41523748; rs41468947;<br>rs17696641; rs12604424; rs12608430; rs149168942;<br>rs77905572; rs4940867; rs78723480                    | <i>CPLX4, LMAN1</i>   |
| <b>Cardiac Troponin T</b> |    |           |   |   |        |                        |        |                                                                                                                                                              |                       |
| rs16862512                | 1  | 169649691 | T | C | 0.0050 | 3.34X10 <sup>-08</sup> | 0.349  |                                                                                                                                                              | <i>Clorf112</i>       |
| rs184837031               | 1  | 201080174 | G | A | 0.0025 | 7.75X10 <sup>-08</sup> | -0.531 | rs80092188                                                                                                                                                   | <i>CACNA1S</i>        |
| rs548487604               | 2  | 85111553  | G | C | 0.0014 | 9.29X10 <sup>-09</sup> | 0.749  |                                                                                                                                                              | <i>TRABD2A</i>        |
| rs147501248               | 2  | 98598992  | T | C | 0.0073 | 4.73X10 <sup>-07</sup> | 0.277  | rs150582665                                                                                                                                                  | <i>TMEM131, ZAP70</i> |
| rs75898208                | 4  | 186911043 | G | A | 0.0017 | 1.69X10 <sup>-09</sup> | 0.735  |                                                                                                                                                              | <i>SORBS2</i>         |
| rs117749317               | 7  | 4274444   | G | A | 0.0287 | 4.70X10 <sup>-07</sup> | 0.135  | rs75274073                                                                                                                                                   | <i>SDK1</i>           |
| rs184140292               | 9  | 8457116   | T | C | 0.0017 | 9.84X10 <sup>-09</sup> | 0.706  |                                                                                                                                                              | <i>PTPRD</i>          |
| rs11223971                | 11 | 134600907 | G | C | 0.2981 | 9.24X10 <sup>-08</sup> | 0.0515 |                                                                                                                                                              | <i>intergenic</i>     |
| rs568331886               | 12 | 3570021   | G | A | 0.0018 | 4.34X10 <sup>-07</sup> | 0.586  |                                                                                                                                                              | <i>PRMT8</i>          |
| rs4759190                 | 12 | 56119244  | A | G | 0.0048 | 2.96X10 <sup>-07</sup> | 0.356  |                                                                                                                                                              | <i>CD63</i>           |
| rs75564981                | 12 | 89939324  | G | A | 0.0102 | 1.43X10 <sup>-07</sup> | 0.228  | rs77029482; rs67661008; rs79105157; rs77685743;<br>rs58302337; rs12580678; rs150210764                                                                       | <i>POC1B</i>          |
| rs73525667                | 13 | 81779870  | G | A | 0.0083 | 3.89X10 <sup>-07</sup> | 0.243  |                                                                                                                                                              | <i>intergenic</i>     |
| rs571544532               | 16 | 20921118  | A | G | 0.0014 | 1.25X10 <sup>-07</sup> | 0.636  |                                                                                                                                                              | <i>LYRMI</i>          |

Supplemental Table 11: Sensitivity analysis for GWAS in those without baseline CVD: Lead SNPs, and other SNPs in the same loci, with GWAS significant associations with either troponin (at  $p < 5 \times 10^{-8}$ )

| Lead SNP                            | Chromosome | Position  | Non-effect allele | Effect allele | Minor allele frequency | P-value                | Beta   | Other SNPs                                                                                                                                                                                                                                                                                                                                | Nearest gene              |
|-------------------------------------|------------|-----------|-------------------|---------------|------------------------|------------------------|--------|-------------------------------------------------------------------------------------------------------------------------------------------------------------------------------------------------------------------------------------------------------------------------------------------------------------------------------------------|---------------------------|
| <b>Cardiac troponin I (n=18276)</b> |            |           |                   |               |                        |                        |        |                                                                                                                                                                                                                                                                                                                                           |                           |
| rs542754544                         | 1          | 37792490  | G                 | T             | 0.0027                 | $3.97 \times 10^{-08}$ | -0.549 |                                                                                                                                                                                                                                                                                                                                           | <i>Intergenic</i>         |
| rs4253248                           | 4          | 187155488 | G                 | A             | 0.4881                 | $1.60 \times 10^{-09}$ | 0.054  | rs7661323; rs7683132; rs7377304; rs1053094; rs12331618; rs11132382; rs4862669; rs2048; rs4253238; rs1912826; rs3775298; rs1511801; rs4241815; rs4241816; rs4241817; rs4241818; rs4253252; rs3733402; rs4253254; rs66530140; rs35984397; rs4253281; rs4253282; rs1973612; rs2304595; rs4253304; rs4253305; rs4253311; rs2292423; rs4241822 | <i>KLKB1, CYP4V2, F11</i> |
| rs71483973                          | 10         | 75900464  | A                 | G             | 0.1675                 | $1.69 \times 10^{-09}$ | 0.076  | rs10824069; rs2270552; rs2131959; rs3793921; rs2131956; rs6480718; rs6688; rs2395086; rs11817132; rs67594352                                                                                                                                                                                                                              | <i>VCL, AP3M1, ADK</i>    |
| rs7481951                           | 11         | 22271870  | A                 | T             | 0.4101                 | $1.59 \times 10^{-10}$ | 0.058  | rs12790951; rs4635079; rs4244488; rs4244490; rs1280778; rs12290197; rs4275631; rs4478991; rs10833711; rs10833712; rs4408310; rs10741930; rs10833719; rs12574283                                                                                                                                                                           | <i>ANO5</i>               |
| rs61971809                          | 14         | 22057505  | T                 | C             | 0.0235                 | $2.25 \times 10^{-08}$ | -0.170 | rs61971816                                                                                                                                                                                                                                                                                                                                | <i>OR10G1P</i>            |
| rs148050755                         | 17         | 62516959  | A                 | C             | 0.0026                 | $5.64 \times 10^{-11}$ | -0.781 |                                                                                                                                                                                                                                                                                                                                           | <i>CEP95, SMURF2</i>      |
| rs2298711                           | 18         | 57000469  | T                 | A             | 0.1506                 | $1.54 \times 10^{-11}$ | 0.085  | rs117153087; rs12604758; rs41468947; rs17696641; rs12604424; rs12608430; rs149168942; rs77905572; rs4940867; rs78723480                                                                                                                                                                                                                   | <i>CPLX4, LMAN1</i>       |
| <b>Cardiac Troponin T (n=18273)</b> |            |           |                   |               |                        |                        |        |                                                                                                                                                                                                                                                                                                                                           |                           |
| rs16862512                          | 1          | 169649691 | T                 | C             | 0.0050                 | $2.70 \times 10^{-08}$ | 0.364  |                                                                                                                                                                                                                                                                                                                                           | <i>C1orf112</i>           |
| rs190069901                         | 4          | 159877305 | A                 | T             | 0.0049                 | $3.87 \times 10^{-08}$ | 0.373  |                                                                                                                                                                                                                                                                                                                                           | <i>C4orf45</i>            |
| rs75898208                          | 4          | 186911043 | G                 | A             | 0.0017                 | $1.64 \times 10^{-10}$ | 0.799  |                                                                                                                                                                                                                                                                                                                                           | <i>SORBS2</i>             |
| rs184140292                         | 9          | 8457116   | T                 | C             | 0.0017                 | $2.66 \times 10^{-08}$ | 0.703  |                                                                                                                                                                                                                                                                                                                                           | <i>PTPRD</i>              |

Supplemental Figure 1: Unadjusted association of hsTnI and hsTnT, by approximate thirds, with the CVD outcome in those without baseline CVD (n=18,624). Each troponin was split into three groups (low; cTnT <3.0ng/L & cTnI ≤1.8ng/L, intermediate; cTnT 3.0-5.7ng/L & cTnI 1.9-3.0ng/L, high cTnT ≥5.8ng/L & cTnI ≥3.1ng/L), so that the proportion within each grouping was similar for each troponin. The solid line is the lowest Tn group (=1), the intermediate Tn group is the dashed line (=2), and the highest Tn group is the dotted line (=3).

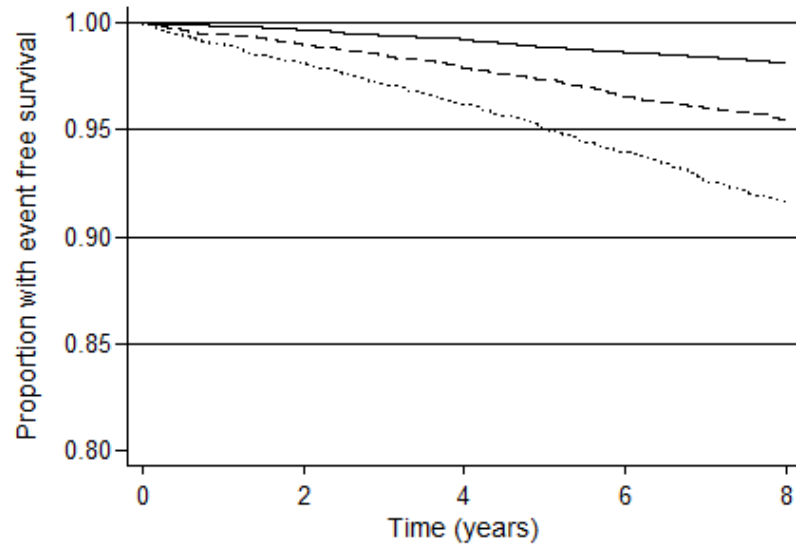

| Number at risk    | 0    | 2    | 4    | 6    | 8    |
|-------------------|------|------|------|------|------|
| hsTnI_tertile = 1 | 9242 | 9202 | 9152 | 9064 | 4900 |
| hsTnI_tertile = 2 | 4843 | 4789 | 4720 | 4640 | 2026 |
| hsTnI_tertile = 3 | 4539 | 4431 | 4314 | 4171 | 1781 |

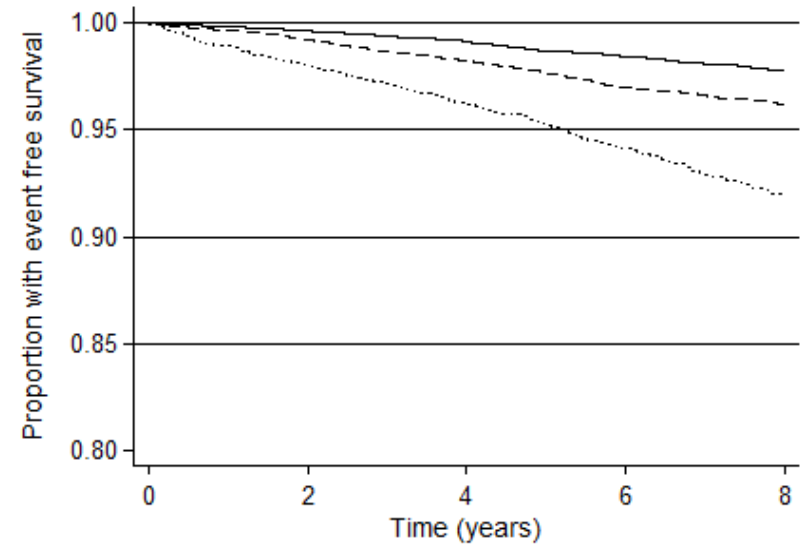

| Number at risk    | 0    | 2    | 4    | 6    | 8    |
|-------------------|------|------|------|------|------|
| hsTnT_tertile = 1 | 8922 | 8883 | 8833 | 8746 | 4853 |
| hsTnT_tertile = 2 | 4983 | 4938 | 4874 | 4794 | 1983 |
| hsTnT_tertile = 3 | 4719 | 4601 | 4479 | 4335 | 1871 |

Supplemental Figure 2: Association of hsTnI and hsTnT unadjusted and adjusted (per table 2) with CVD death. The referent (HR=1) is undetectable levels of hsTnI and hsTnT respectively. Both x and y-axes on log scale.

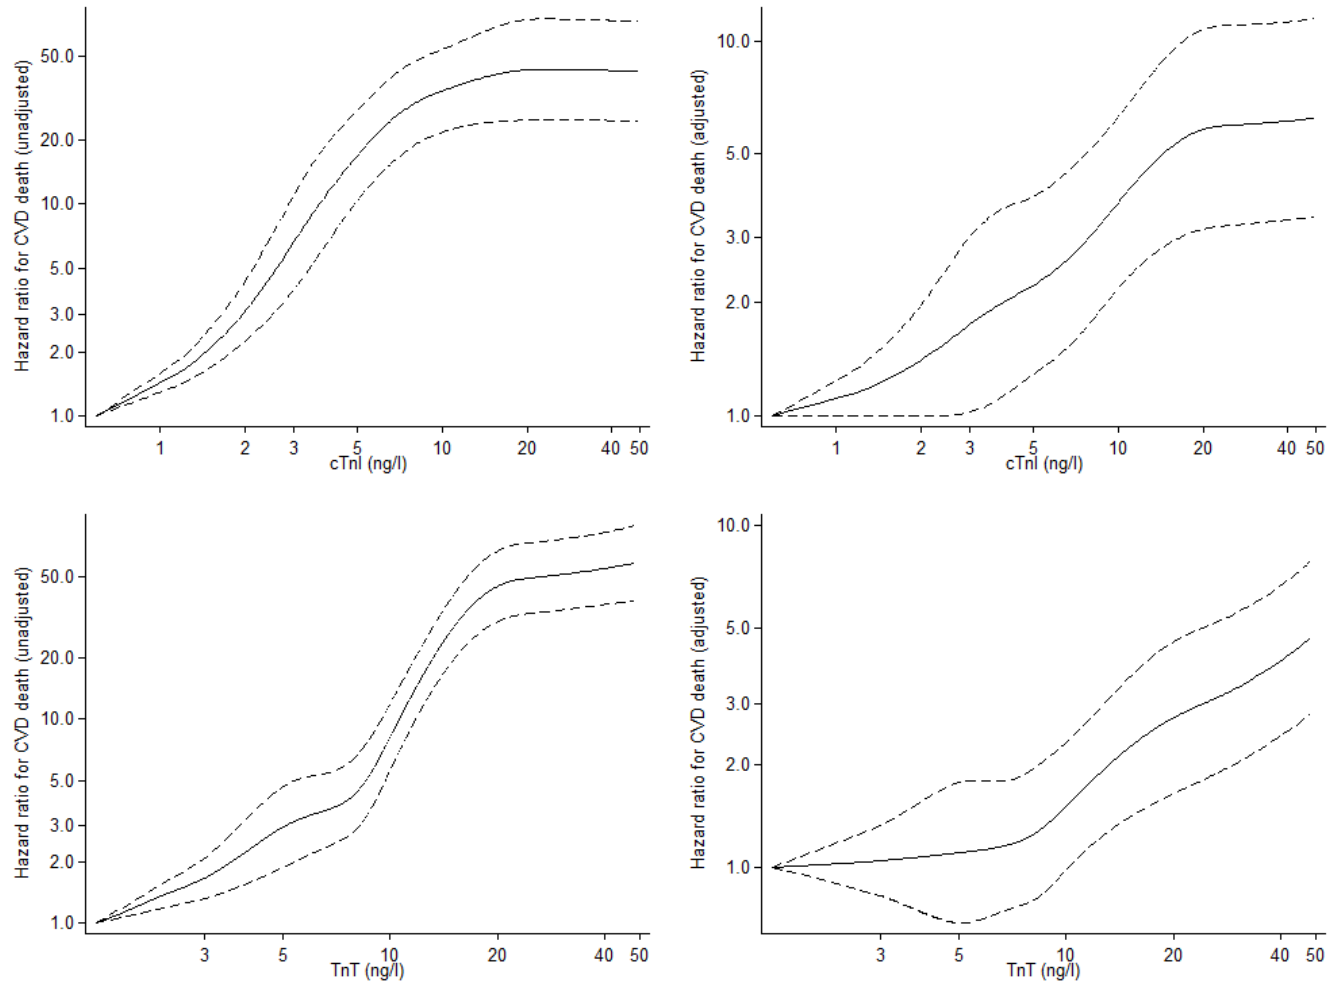



Supplemental Figure 3: Association of hsTnI and hsTnT unadjusted and adjusted (per table 2) with non-CVD death. The referent (HR=1) is undetectable levels of hsTnI and hsTnT respectively. Both x and y-axes on log scale.

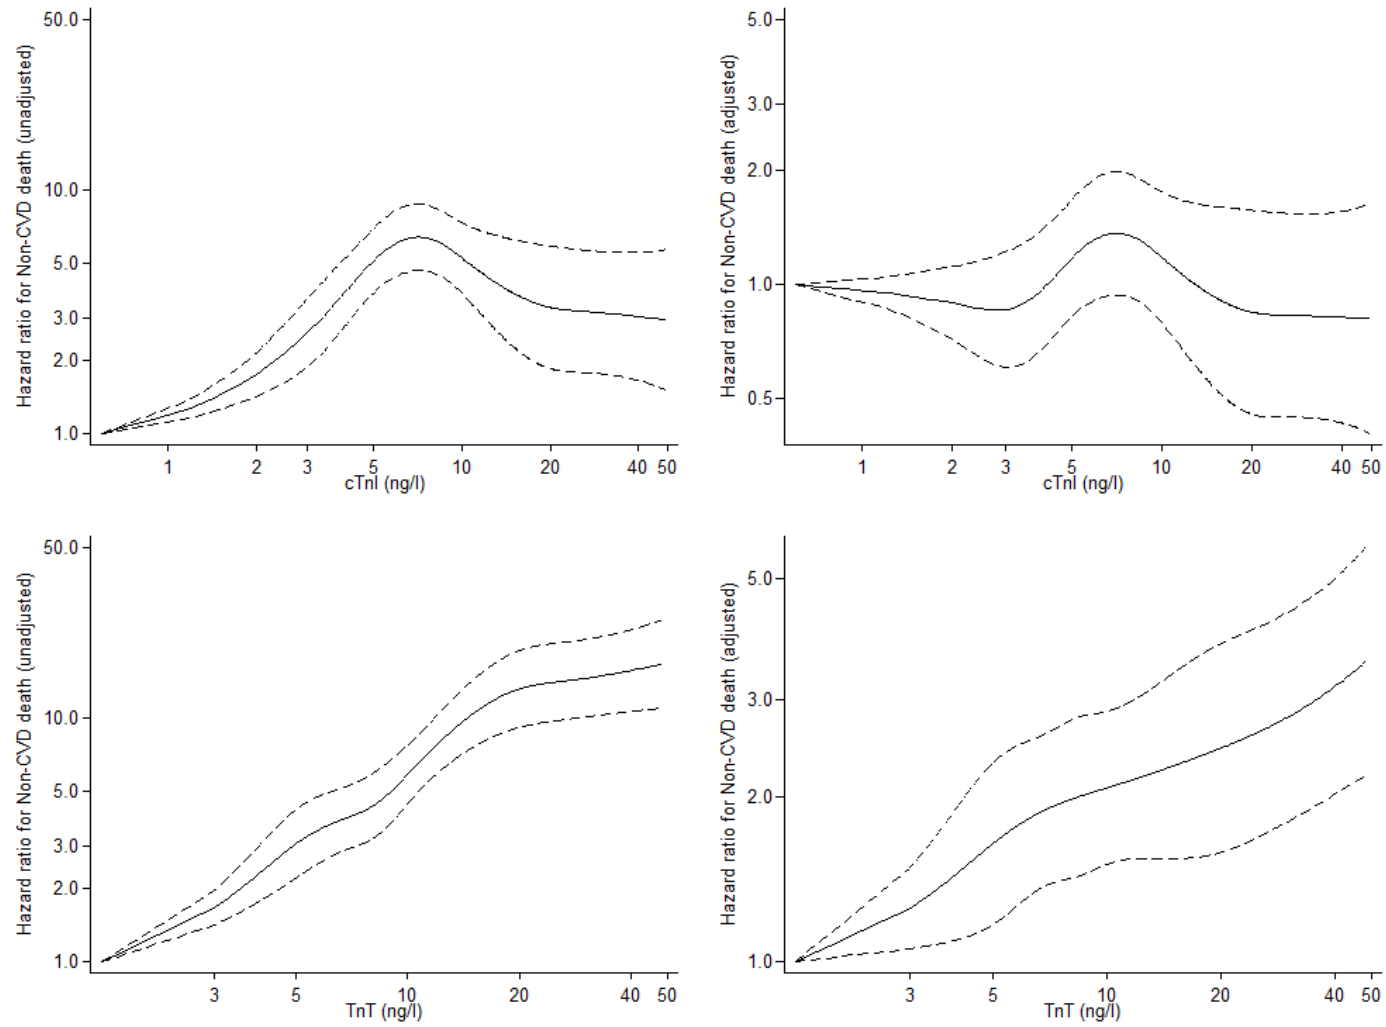

Supplemental Figure 4: Association of hsTnI and hsTnT unadjusted and adjusted (per table 2) with all cause mortality. The referent (HR=1) is undetectable levels of hsTnI and hsTnT respectively. Both x and y-axes on log scale.

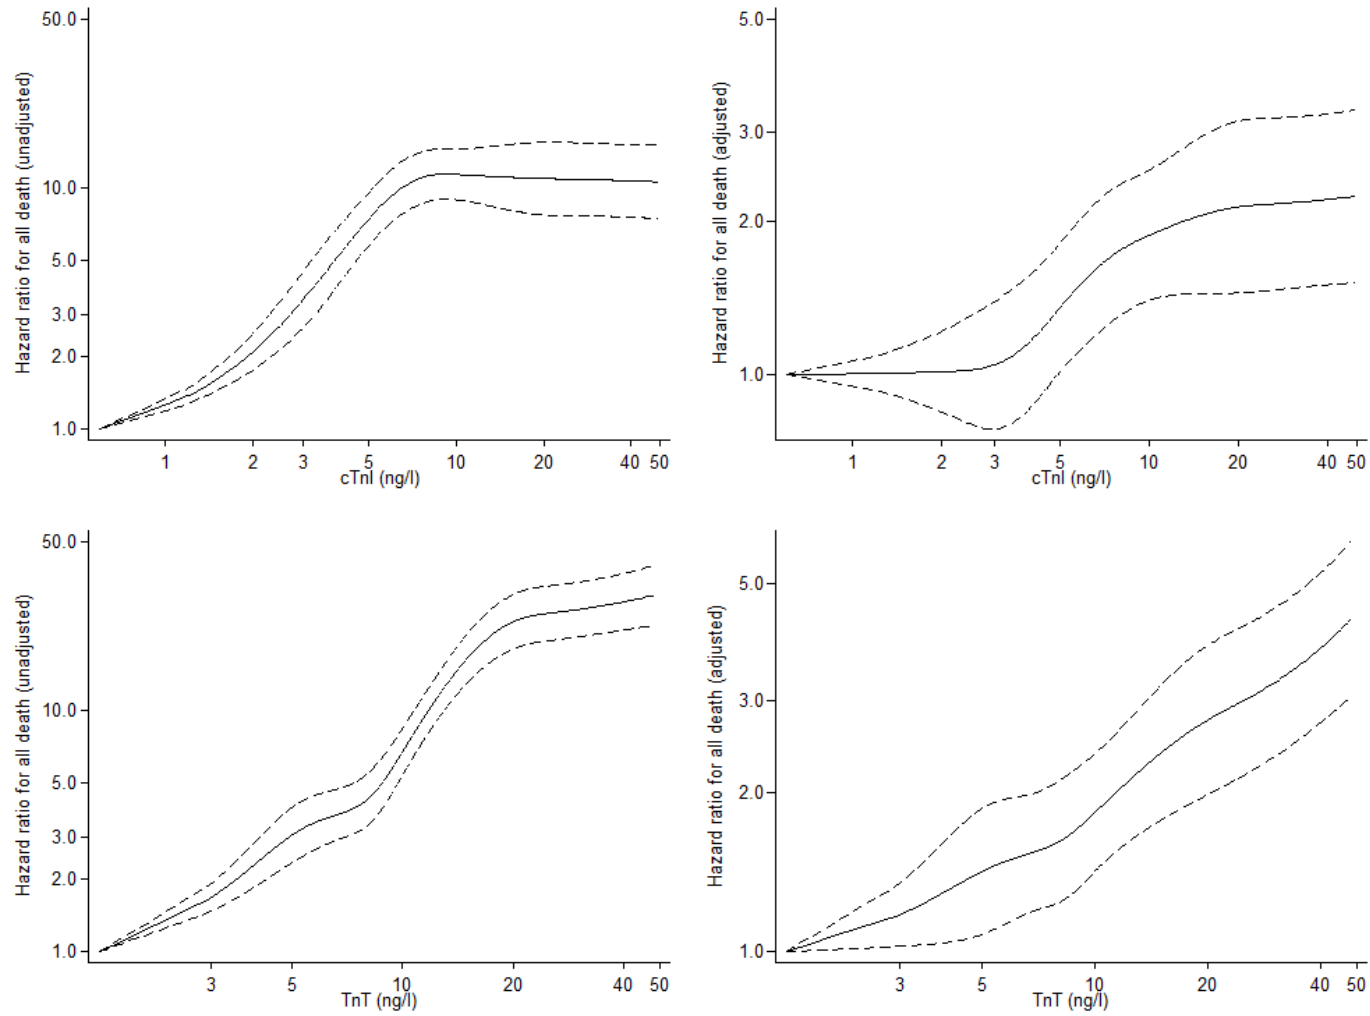

Supplemental Figure 5: Association of hsTnI and hsTnT unadjusted and adjusted (per table 2) with myocardial infarction. The referent (HR=1) is undetectable levels of hsTnI and hsTnT respectively. Both x and y-axes on log scale.

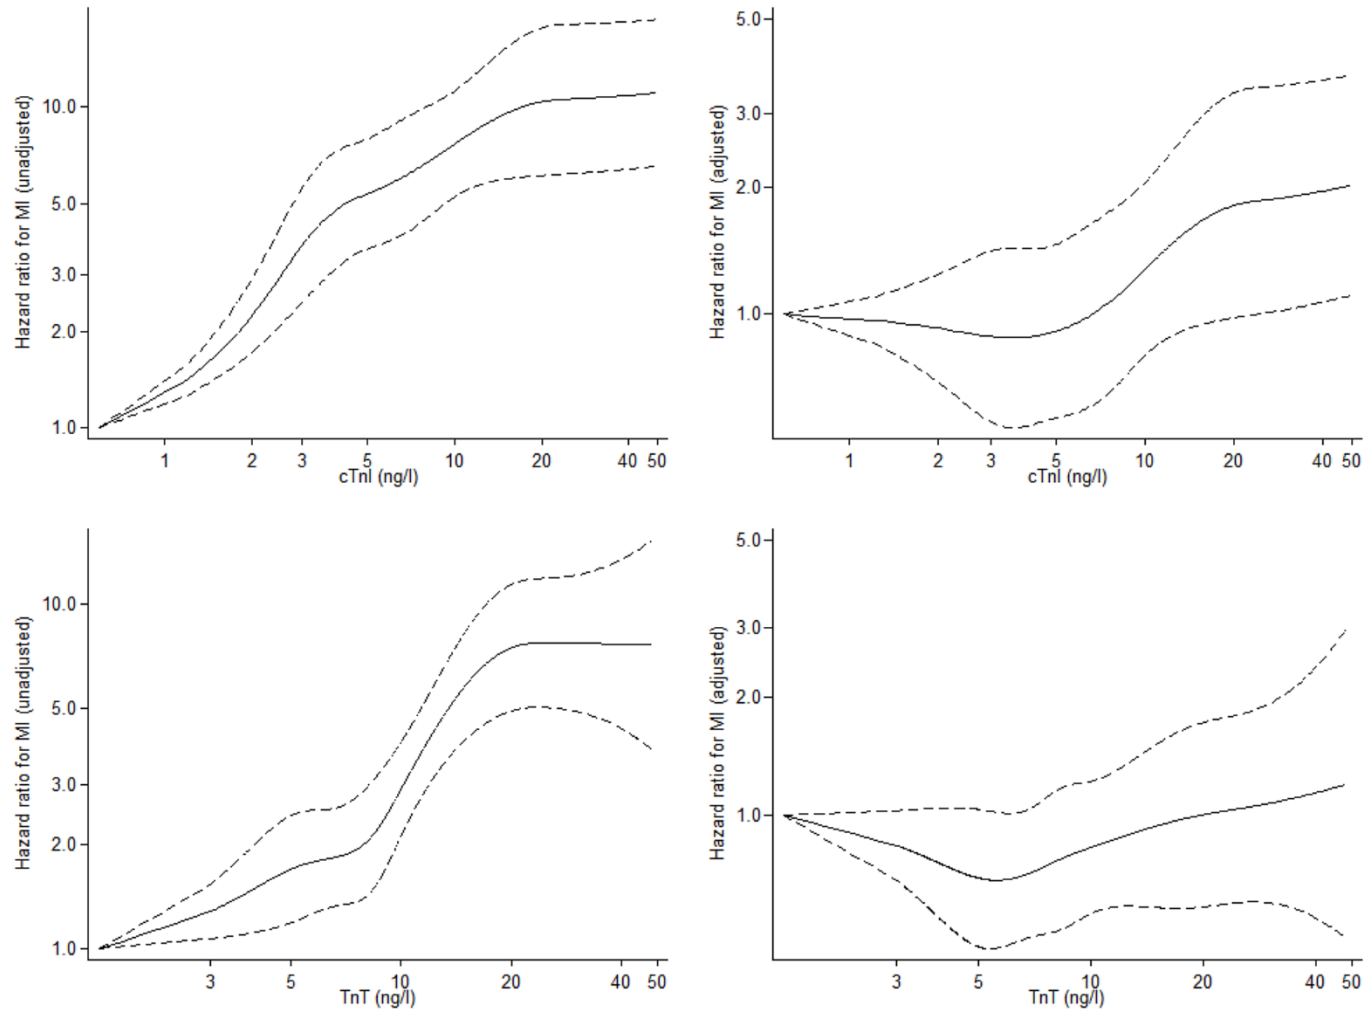

Supplemental Figure 6: Association of hsTnI and hsTnT unadjusted and adjusted (per table 2) with CHD. The referent (HR=1) is undetectable levels of hsTnI and hsTnT respectively. Both x and y-axes on log scale.

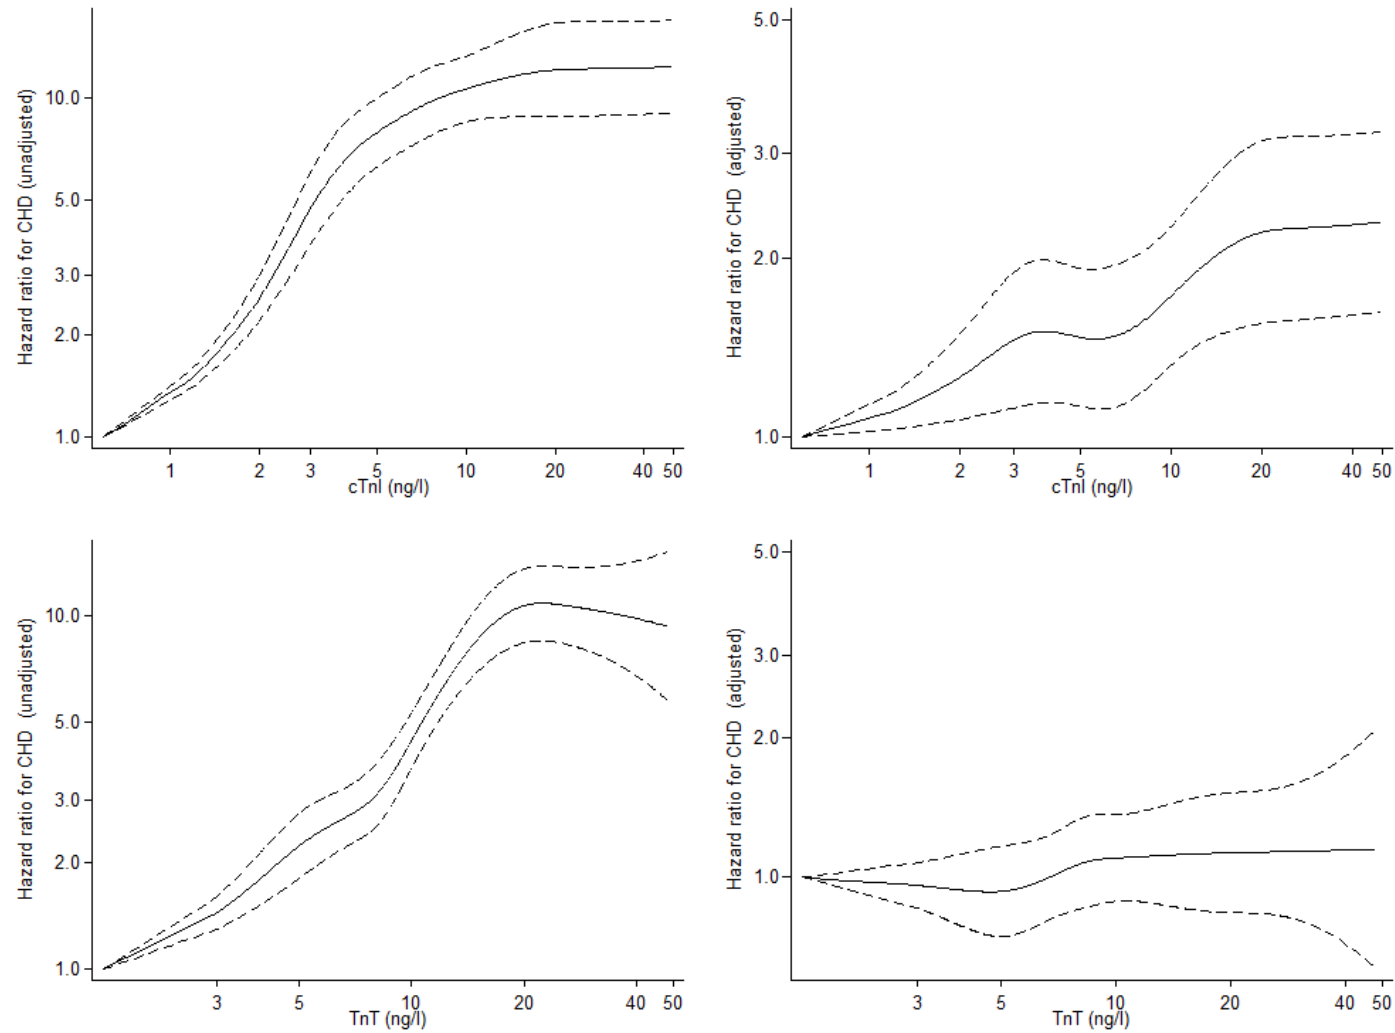

Supplemental Figure 7: Association of hsTnI and hsTnT unadjusted and adjusted (per table 2) with ischaemic stroke. The referent (HR=1) is undetectable levels of hsTnI and hsTnT respectively. Both x and y-axes on log scale.

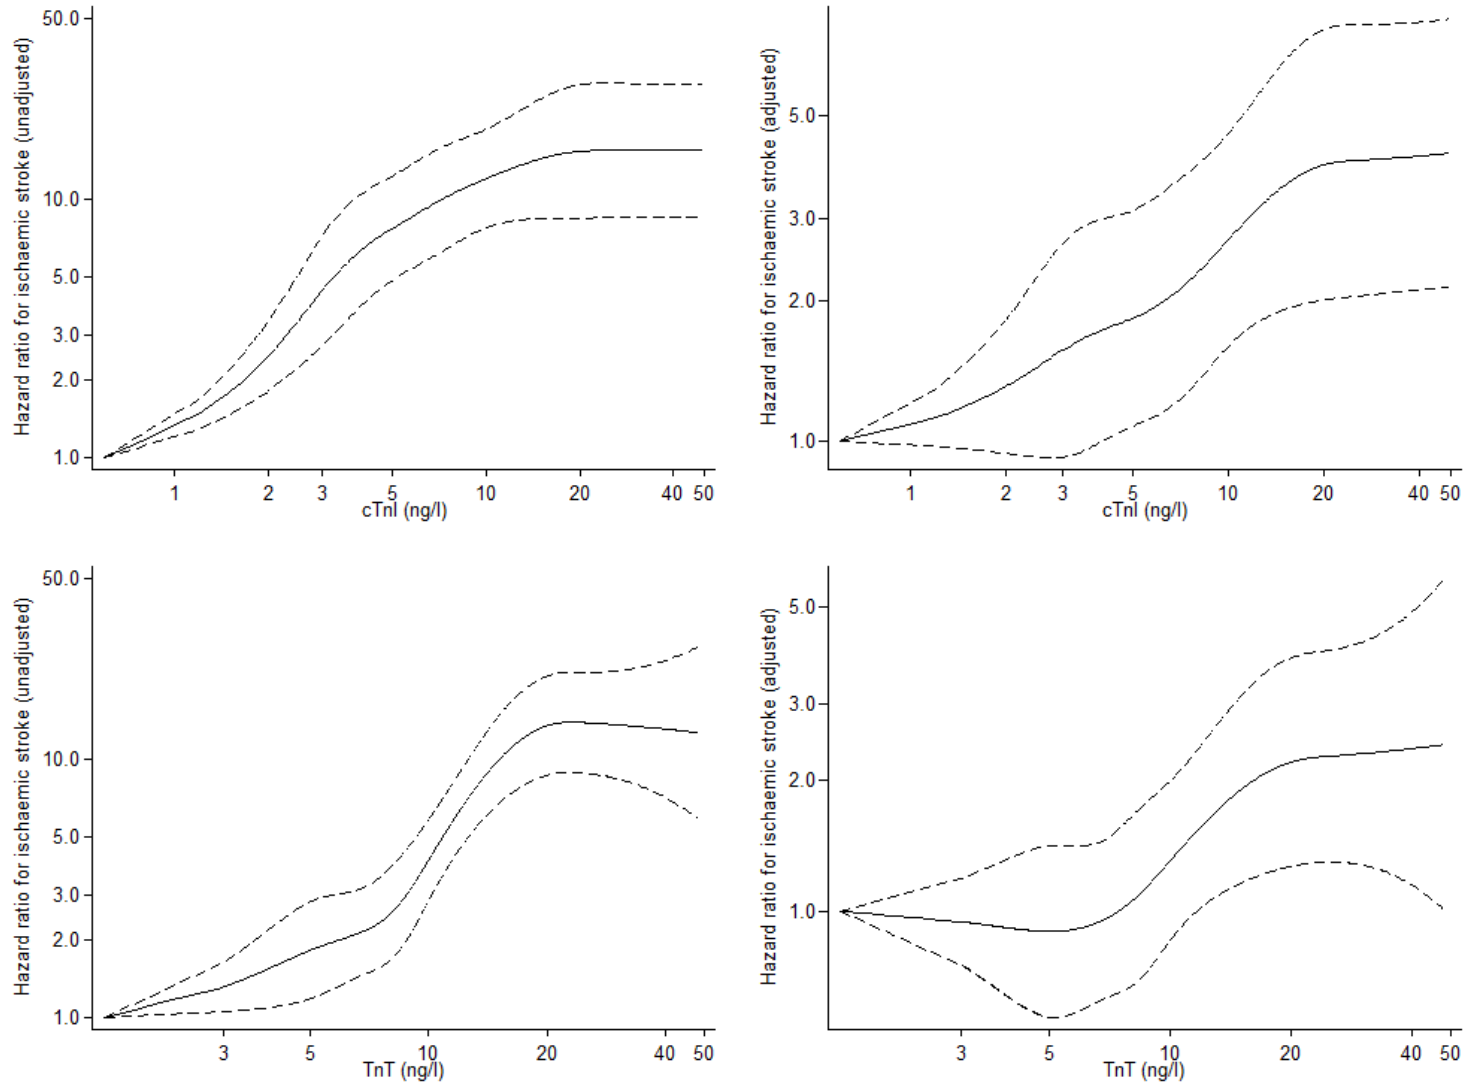

Supplemental Figure 8: Association of hsTnI and hsTnT unadjusted and adjusted (per table 2) with heart failure. The referent (HR=1) is undetectable levels of hsTnI and hsTnT respectively. Both x and y-axes on log scale

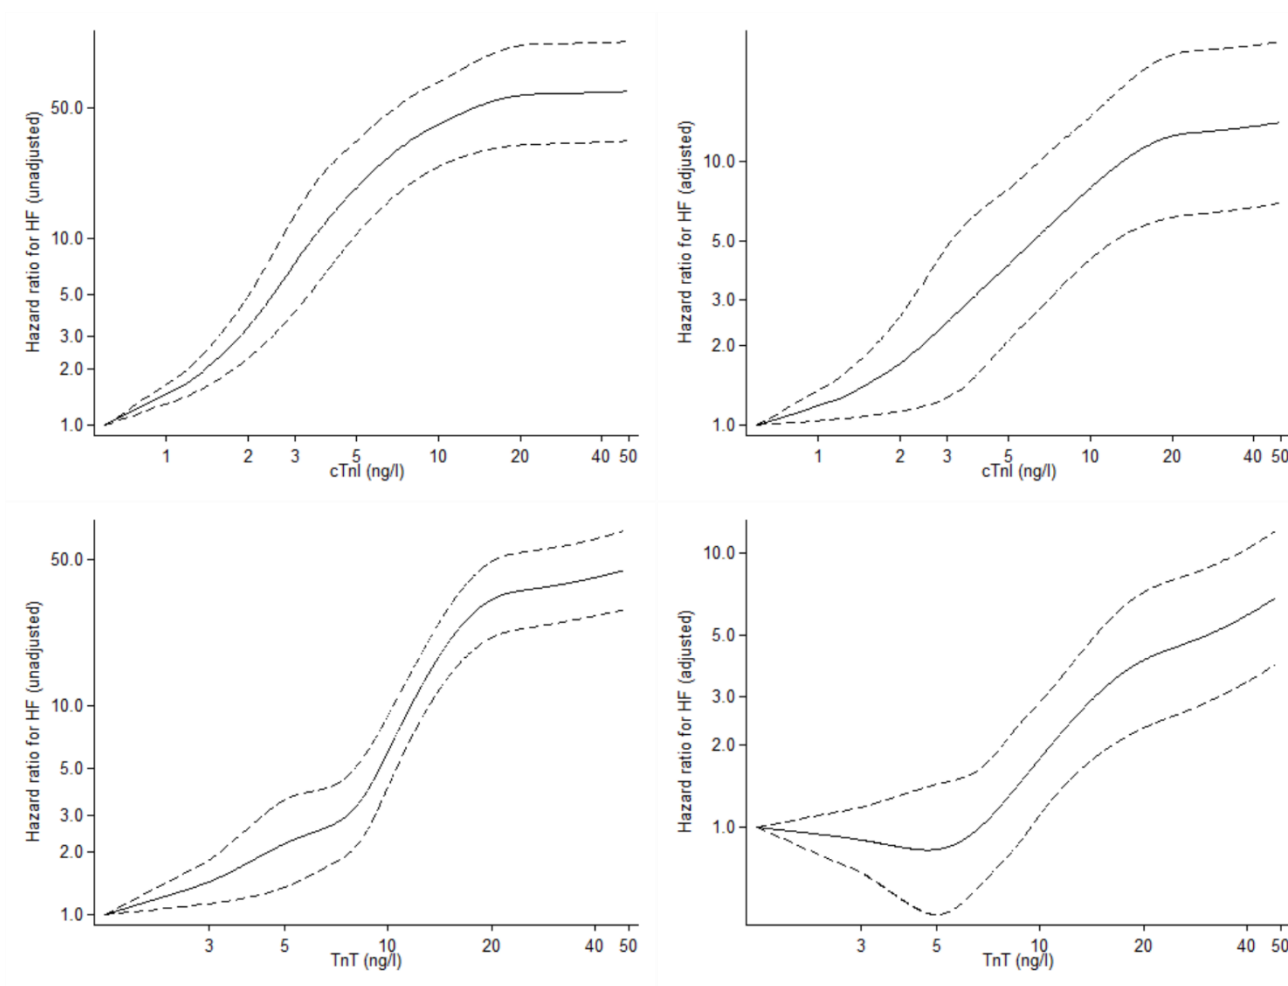

Supplemental Figure 9: Association of hsTnI and hsTnT unadjusted and adjusted (per table 2) with cancer. The referent (HR=1) is undetectable levels of hsTnI and hsTnT respectively. Both x and y-axes on log scale.

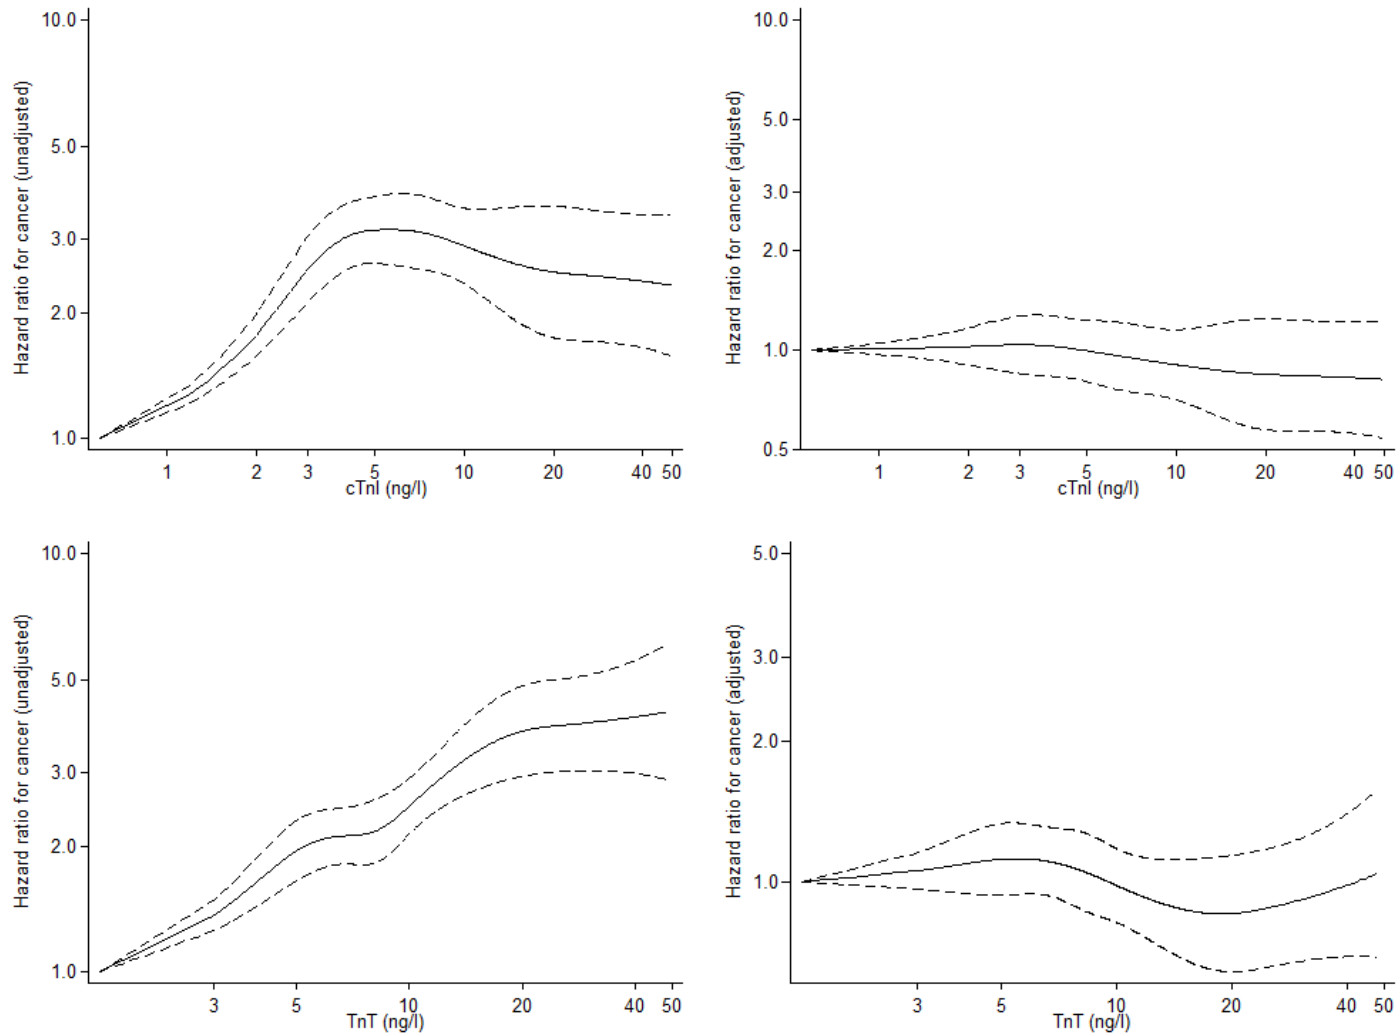

Supplemental Figure 10: Association of hsTnI (left) and hsTnT (right) with the composite CVD outcome, stratified by baseline risk factors, with p-value for interaction.

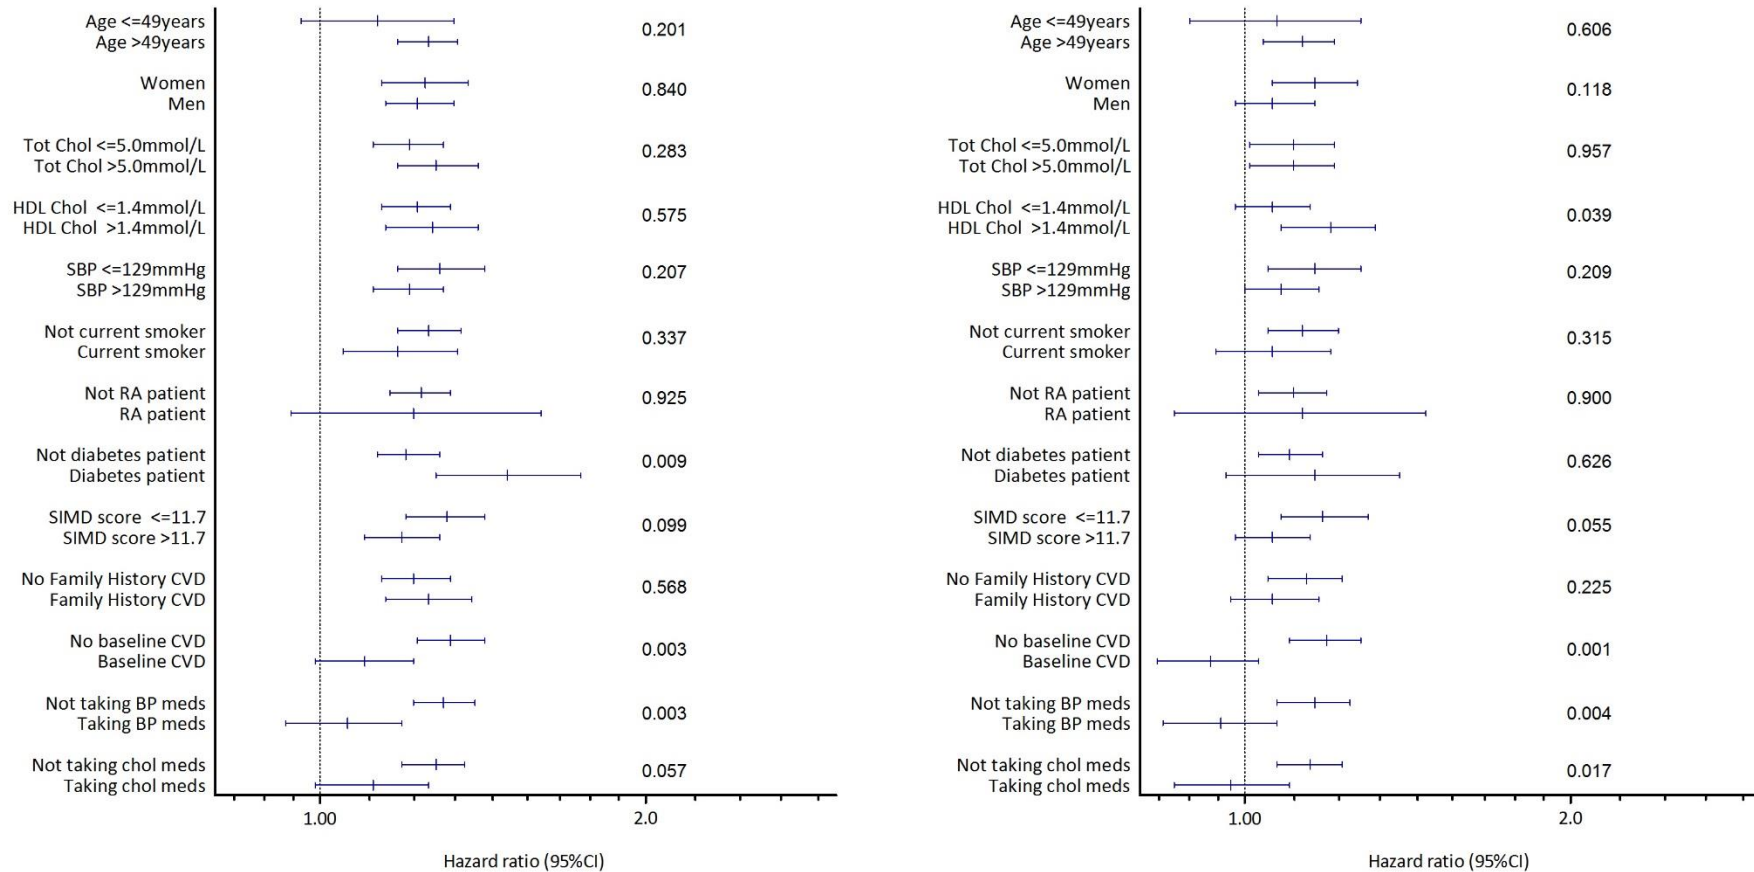

Supplement: cir-139-2754-s001.pdf [file cir-139-2754-s001.pdf]
